# Supplementary material for: Effect of COVID-19 on presentations of decompensated liver disease in Scotland
Source: PubMed Central journal article supplement (PMC8739538; doi:10.1136/bmjgast-2021-000795), 2022-01-06
Supplement: bmjgast-2021-000795supp001.pdf [file bmjgast-2021-000795supp001.pdf]

|                           |                                      | Reference range | 2017-2019 (n=237) Pre-COVID | 2020 (n=76) Lockdown | p-value |
|---------------------------|--------------------------------------|-----------------|-----------------------------|----------------------|---------|
| Patient demographics      | Age (years)                          |                 | 57 (49-62)                  | 58 (48-65)           | 0.690   |
|                           | Gender (male) (%)                    |                 | 153 (64.6%)                 | 40 (52.6%)           | 0.063   |
| Admission characteristics | Haemoglobin (g/L)                    | 115-165         | 107 (90-122)                | 104 (83-121)         | 0.388   |
|                           | White cell count (x10 <sup>9</sup> ) | 4-11            | 8.2 (6.1-12.0)              | 7.6 (5.3-11.2)       | 0.106   |
|                           | Neutrophils (x10 <sup>9</sup> )      | 2-7.5           | 5.61 (1.08-9.20)            | 4.85 (3.19-7.98)     | 0.086   |
|                           | Lymphocytes (x10 <sup>9</sup> )      | 1.5-4.5         | 1.13 (0.75-1.72)            | 1.18 (0.79-1.95)     | 0.494   |
|                           | Platelets (x10 <sup>9</sup> )        | 150-400         | 114 (74-170)                | 133 (84-187)         | 0.211   |
|                           | Prothrombin time (seconds)           | 10.5-13.5       | 18 (15-23)                  | 17 (15-21)           | 0.132   |
|                           | Urea (mmol/L)                        | 2.5-6.6         | 4.9 (3.1-9.3)               | 5.2 (2.9-9.4)        | 0.711   |
|                           | Sodium (mmol/L)                      | 135-145         | 133 (129-137)               | 136 (131-139)        | 0.010   |
|                           | Creatinine (mmol/L)                  | 50-98           | 70 (59-105)                 | 75 (58-109)          | 0.806   |
|                           | Potassium (mmol/L)                   | 3.6-5           | 3.9 (3.5-4.4)               | 3.9 (3.3-4.4)        | 0.388   |
|                           | Bilirubin (mmol/L)                   | 3-21            | 68 (33-159)                 | 61 (31-111)          | 0.270   |
|                           | ALT (U/L)                            | 10-50           | 34 (21-56)                  | 33 (22-54)           | 0.998   |
|                           | ALP (U/L)                            | 40-125          | 180 (119-251)               | 164 (124-213)        | 0.170   |
| Inpatient outcomes        | MELD                                 |                 | 17 (13-23)                  | 17 (13-21)           | 0.307   |
|                           | UKELD                                |                 | 58 (54-63)                  | 57 (53-60)           | 0.040   |
|                           | Length of stay (days)                |                 | 7 (4-15)                    | 7 (4-14)             | 0.821   |
| Disease characteristics   | Inpatient mortality (%)              |                 | 32 (13.5%)                  | 5 (6.6%)             | 0.104   |
|                           | HCC (%)                              |                 | 18 (7.6%)                   | 2 (2.6%)             | 0.124   |
|                           | Ascites (%)                          |                 | 156 (65.8%)                 | 47 (61.8%)           | 0.527   |
|                           | Varices* (%)                         |                 | 147 (63.4%)                 | 41 (57.7%)           | 0.394   |
|                           | HE (%)                               |                 | 86 (36.3%)                  | 16 (21.1%)           | 0.014   |
| Reason for admission      | Decompensation (%)                   |                 | 198 (83.5%)                 | 56 (73.7%)           | 0.056   |
|                           | Non-decompensation (%)               |                 | 39 (16.5%)                  | 20 (26.3%)           |         |

Table 3: A table to compare admission characteristics 2020 in patients with ARLD cirrhosis and those in 2017-2019. All data presented as median and interquartile range unless otherwise stated. \*Those who had not had a baseline endoscopy were excluded (n=10). All values are median/interquartile range unless otherwise stated. Abbreviations: WCC-white cell count; PT-prothrombin time; ALT- alanine transaminase; ALP-alkaline phosphatase; MELD-Modified score for End-stage Liver Disease; UKELD-United Kingdom End-stage Liver Disease score; HCC-hepatocellular carcinoma; ARLD-alcohol related liver disease.
